# Supplementary material for: Effects of ionic liquids on the reaction kinetics of a laccase–mediator system
Source: Royal Society of Chemistry journal article supplement (doi:10.1039/c4ra00733f), 2014-01-01
Supplement: c4ra00733f1.pdf [file c4ra00733f1.pdf]

### Supplemental Information

**Table A.** Conductivity, viscosity, and kinetic constants of the ABTS – veratryl alcohol electrochemical reaction in 0.1 M sodium acetate buffer pH 4.5, and in 5, 15, 30% (v/v) [EMIM][Ac] and [EMIM][EtSO<sub>4</sub>] solutions as well as ionic liquid equivalent solutions made up from 0.1 M sodium acetate buffer, pH 4.5, with NaCl and PEG<sub>400</sub>. Scan rates 10 – 80 mV/s, Potential range 0 – 1200 mV, 1 mM ABTS, 0 – 15 mM veratryl alcohol.

| Solution                             | Conductivity [mS/cm] | Viscosity [Pa.s] | k [M <sup>-1</sup> s <sup>-1</sup> ] |
|--------------------------------------|----------------------|------------------|--------------------------------------|
| buffer only                          | 12.2                 | 0.00124          | 335.3                                |
| 5% (v/v) ionic liquid eqv.           | 22.0                 | 0.00140          | 864.5                                |
| 15% (v/v) ionic liquid eqv.          | 38.8                 | 0.00182          | 241.2                                |
| 30% (v/v) ionic liquid eqv.          | 46.3                 | 0.00298          | 0.0                                  |
| 5% (v/v) [EMIM][Ac]                  | 23.1                 | 0.00143          | 715.1                                |
| 15% (v/v) [EMIM][Ac]                 | 42.4                 | 0.00201          | 115.9                                |
| 30% (v/v) [EMIM][Ac]                 | 47.1                 | 0.00344          | 0.0                                  |
| 5% (v/v) [EMIM][EtSO <sub>4</sub> ]  | 20.9                 | 0.00138          | 373.9                                |
| 15% (v/v) [EMIM][EtSO <sub>4</sub> ] | 35.2                 | 0.00163          | 366.6                                |
| 30% (v/v) [EMIM][EtSO <sub>4</sub> ] | 45.4                 | 0.00252          | 0.0                                  |

**Table B.** Concentrations of NaCl and PEG<sub>400</sub> to obtain ionic liquid equivalent solutions

| Solution                   | % (v/v) IL eqv. | mg PEG <sub>400</sub> / ml Buffer | mg NaCl / ml Buffer |
|----------------------------|-----------------|-----------------------------------|---------------------|
| Buffer                     | 0               | 0                                 | 0                   |
|                            | 5               | 58.1                              | 11.8                |
|                            | 15              | 113.6                             | 21.7                |
|                            | 30              | 218                               | 26.4                |
| [EMIM][Ac]                 | 0               | 32.5                              | 0                   |
|                            | 5               | 61.9                              | 11.8                |
|                            | 15              | 134.7                             | 21.7                |
|                            | 30              | 248.3                             | 26.4                |
| [EMIM][EtSO <sub>4</sub> ] | 0               | 34.5                              | 0                   |
|                            | 5               | 54.3                              | 11.8                |
|                            | 15              | 90.3                              | 21.7                |
|                            | 30              | 182.5                             | 26.4                |

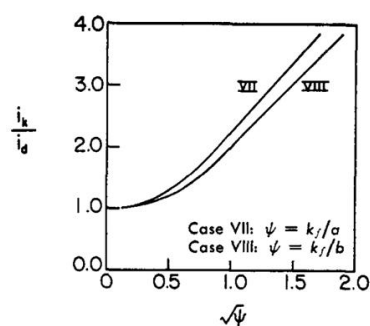

**Figure A.** Working curves according to Nicholson and Shain – Case for catalytic reaction with reversible/irreversible charge transfer (Ratio of the kinetic and diffusion peak currents  $i_k/i_d$ )<sup>33</sup> Reprinted with permission from Nicholson, R. S. and I. Shain (1964). "Theory of stationary electrode polarography -

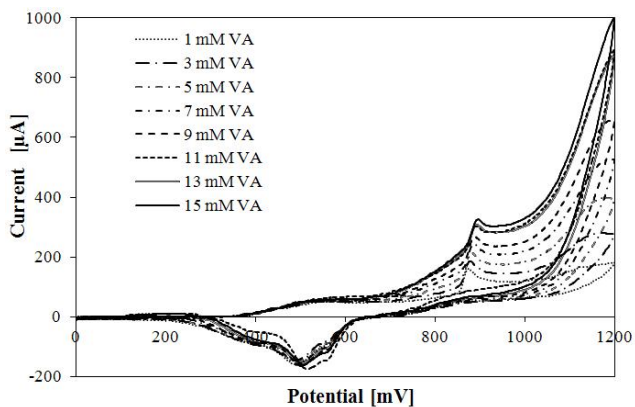

Figure B. Cyclic voltammograms of 2 mM ABTS with 1 – 15 mM veratryl alcohol in 0.05 M citric acid / 0.1 M  $\text{Na}_2\text{HPO}_4$  buffer, pH 4.9. Scan rate 10 mV/s. Potential: 0 – 1200 mV, T = Room temperature  $\sim 22^\circ\text{C}$ .

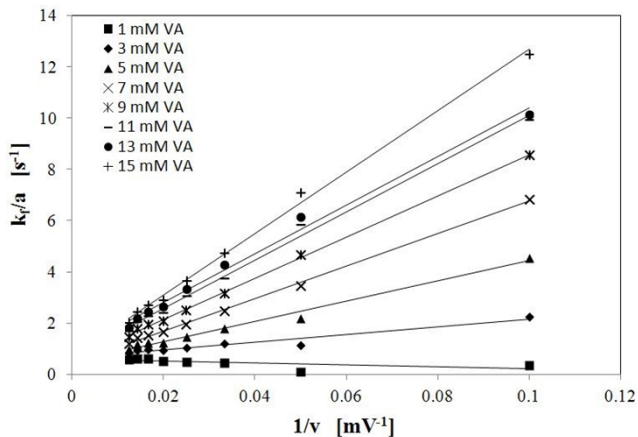

Figure C. Kinetic parameters,  $k_f/a$ , at varying substrate concentrations obtained from working curves (Figure A) versus the inverse scan rates ( $1/v$ ) – the linear regression of the slope at each concentration gives the pseudo-first order rate constants,  $k_f$

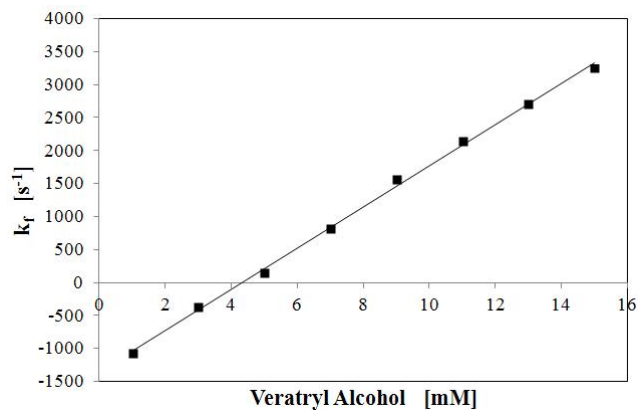

Figure D. Pseudo-first order rate constant ( $k_f$ , obtained from Figure C) versus veratryl alcohol substrate concentration – the linear regression of the slope gives the second-order homogenous rate constant,  $k$
